# Supplementary material for: A bibliometric analysis of light chain amyloidosis from 2005 to 2024: research trends and hot spots
Source: Front Med (Lausanne). 2024 Jul 30;11:1441032. doi: 10.3389/fmed.2024.1441032 (PMC11320149; doi:10.3389/fmed.2024.1441032)
Supplement: Supplementary file 1 [file Data_Sheet_1.XLS]

## Sheet: countries
Countries/Regions	Record Count	Citation	Average Citation	Total link strength	% of 2,864
USA	1182	46900	39.6785	34766	41.376
ITALY	395	21718	54.9823	21431	13.792
ENGLAND	278	21114	75.9496	17640	9.707
GERMANY	266	11770	44.2481	11823	9.288
FRANCE	215	11141	51.8186	9200	7.507
JAPAN	214	3627	16.9486	4267	7.472
CHINA	196	2666	13.602	5154	6.844
SPAIN	103	4400	42.7184	4261	3.596
GREECE	92	4903	53.2935	6270	3.212
CANADA	87	3967	45.5977	4314	3.038
NETHERLANDS	81	6690	82.5926	4680	2.828
AUSTRALIA	61	2198	36.0328	2794	2.13
ISRAEL	56	1336	23.8571	2176	1.955
SWEDEN	50	3002	60.04	1525	1.746
SOUTH KOREA	43	757	17.6047	1562	1.501
SWITZERLAND	43	1578	36.6977	1186	1.501
AUSTRIA	35	1993	56.9429	1076	1.222
BELGIUM	32	1654	51.6875	1619	1.117
CZECH REPUBLIC	32	1810	56.5625	1294	1.117
RUSSIA	32	455	14.2188	411	1.117
POLAND	31				1.082
INDIA	27				0.943
BRAZIL	26				0.908
MEXICO	25				0.873
TURKEY	23				0.803
SAUDI ARABIA	22				0.768
DENMARK	19				0.663
PORTUGAL	18				0.628
HUNGARY	15				0.524
NORWAY	10				0.349
ARGENTINA	9				0.314
ROMANIA	9				0.314
TAIWAN	9				0.314
SCOTLAND	8				0.279
SERBIA	8				0.279
FINLAND	7				0.244
IRELAND	7				0.244
NEW ZEALAND	7				0.244
SINGAPORE	7				0.244
CHILE	6				0.209
LEBANON	6				0.209
LITHUANIA	6				0.209
SOUTH AFRICA	6				0.209
TUNISIA	5				0.175
CROATIA	4				0.14
CYPRUS	4				0.14
NORTH IRELAND	4				0.14
SLOVENIA	4				0.14
TURKIYE	4				0.14
COLOMBIA	3				0.105
WALES	3				0.105
EGYPT	2				0.07
IRAN	2				0.07
MALAYSIA	2				0.07
U ARAB EMIRATES	2				0.07
URUGUAY	2				0.07
ALGERIA	1				0.035
ARMENIA	1				0.035
BANGLADESH	1				0.035
BRUNEI	1				0.035
CAYMAN ISLANDS	1				0.035
IRAQ	1				0.035
JAMAICA	1				0.035
JORDAN	1				0.035
PAKISTAN	1				0.035
PERU	1				0.035
QATAR	1				0.035
SLOVAKIA	1				0.035
THAILAND	1				0.035
UKRAINE	1				0.035
9 record(s) (0.314%) do not contain data in the field being analyzed

## Sheet: publication years
Publication Years	Annual publication	Cumulative publication	% of 2,864
2005	77	77	2.689
2006	89	166	3.108
2007	79	245	2.758
2008	84	329	2.933
2009	93	422	3.247
2010	100	522	3.492
2011	104	626	3.631
2012	124	750	4.33
2013	127	877	4.434
2014	129	1006	4.504
2015	127	1133	4.434
2016	174	1307	6.075
2017	183	1490	6.39
2018	169	1659	5.901
2019	205	1864	7.158
2020	271	2135	9.462
2021	224	2359	7.821
2022	246	2605	8.589
2023	211	2816	7.367
2024	48	2864	1.676

## Sheet: organization
Organizaiton	Country	Documents	Citations	Average Citation
Mayo Clin		394	21820	55.3807
Univ Pavia		190	12540	66
Boston Univ		175	11270	64.4
Ucl		153	12438	81.2941
Fdn Irccs Policlin San Matteo		69	3542	51.3333
Heidelberg Univ		63	3729	59.1905
Boston Med Ctr		62	3252	52.4516
Mem Sloan Kettering Canc Ctr		57	3553	62.3333
Tufts Med Ctr		56	3264	58.2857
Columbia Univ		55	4536	82.4727
Natl & Kapodistrian Univ Athens		46	699	15.1957
Stanford Univ		45	1383	30.7333
Harvard Med Sch		40	1017	25.425
Brigham & Womens Hosp		38	3965	104.342
Med Coll Wisconsin		37	762	20.5946
Shinshu Univ		37	705	19.0541
Univ Tennessee		32	1983	61.9688
Cleveland Clin		29	1464	50.4828
Univ Athens		29	3068	105.793
Kumamoto Univ		28	905	32.3214

## Sheet: leading authors
Author name	Documents	Citations	Average Citation	Total link strength
Dispenzieri, Angela	199	10529	52.9095	17441
Gertz, Morie A.	165	8953	54.2606	18772
Merlini, Giampaolo	135	9080	67.2593	17576
Palladini, Giovanni	119	6618	55.6134	16487
Leung, Nelson	110	5484	49.8545	10077
Sanchorawala, Vaishali	101	3509	34.7426	7874
Lacy, Martha Q.	91	4325	47.5275	10036
Hawkins, Philip N.	86	9035	105.058	8178
Dingli, David	80	3303	41.2875	8828
Rajkumar, S. Vincent	80	4263	53.2875	8271
Wechalekar, Ashutosh D.	79	5587	70.7215	7670
Buadi, Francis K.	78	3324	42.6154	9027
Hegenbart, Ute	78	4343	55.6795	8024
Hayman, Suzanne R.	74	3809	51.473	8568
Gillmore, Julian D.	73	6118	83.8082	5512
Kumar, Shaji K.	72	2725	37.8472	8078
Kyle, Robert A.	71	4649	65.4789	7365
Kapoor, Prashant	69	1874	27.1594	6774
Milani, Paolo	68	2900	42.6471	9228
Kastritis, Efstathios	59	2831	47.9831	6703

## Sheet: sources
Sources/Journals	Documents	Citations	Average Citation
Amyloid-Journal Of Protein Folding Disorders	152	2567	16.8882
Blood	95	9384	98.7789
American Journal Of Hematology	57	2673	46.8947
British Journal Of Haematology	48	1207	25.1458
Clinical Lymphoma Myeloma & Leukemia	41	397	9.6829
Internal Medicine	40	251	6.275
Bone Marrow Transplantation	37	1147	31
Leukemia	35	2707	77.3429
Blood Cancer Journal	31	721	23.2581
Haematologica	31	1447	46.6774
European Journal Of Haematology	29	366	12.6207
Frontiers In Cardiovascular Medicine	28	116	4.1429
Jacc-Cardiovascular Imaging	27	2630	97.4074
Nephrology Dialysis Transplantation	26	673	25.8846
Biology Of Blood And Marrow Transplantation	25	405	16.2
International Journal Of Hematology	24	152	6.3333
Esc Heart Failure	23	244	10.6087
Journal Of Clinical Medicine	23	57	2.4783
Leukemia & Lymphoma	22	332	15.0909
Plos One	22	496	22.5455

## Sheet: cited-references
Document	total citations	total link strength
Gertz Ma, 2005, Am J Hematol, V79, P319, Doi 10.1002/Ajh.20381	695	5598
Kumar S, 2012, J Clin Oncol, V30, P989, Doi 10.1200/Jco.2011.38.5724	494	4802
Dispenzieri A, 2004, J Clin Oncol, V22, P3751, Doi 10.1200/Jco.2004.03.029	492	4891
Palladini G, 2012, J Clin Oncol, V30, P4541, Doi 10.1200/Jco.2011.37.7614	472	4577
Merlini G, 2003, New Engl J Med, V349, P583, Doi 10.1056/Nejmra023144	431	3377
Kyle Ra, 1995, Semin Hematol, V32, P45	395	2768
Skinner M, 2004, Ann Intern Med, V140, P85, Doi 10.7326/0003-4819-140-2-200401200-00008	320	2804
Vrana Ja, 2009, Blood, V114, P4957, Doi 10.1182/Blood-2009-07-230722	267	2430
Falk Rh, 1997, New Engl J Med, V337, P898, Doi 10.1056/Nejm199709253371306	266	1539
Wechalekar Ad, 2013, Blood, V121, P3420, Doi 10.1182/Blood-2012-12-473066	263	2903
Jaccard A, 2007, New Engl J Med, V357, P1083, Doi 10.1056/Nejmoa070484	260	3201
Gillmore Jd, 2016, Circulation, V133, P2404, Doi 10.1161/Circulationaha.116.021612	245	2022
Palladini G, 2003, Circulation, V107, P2440, Doi 10.1161/01.Cir.0000068314.02595.B2	240	2660
Palladini G, 2014, Blood, V124, P2325, Doi 10.1182/Blood-2014-04-570010	237	2328
Kyle Ra, 1992, Blood, V79, P1817	235	2371
Palladini G, 2004, Blood, V103, P2936, Doi 10.1182/Blood-2003-08-2788	221	2819
Palladini G, 2015, Blood, V126, P612, Doi 10.1182/Blood-2015-01-620302	217	2513
Comenzo Rl, 2012, Leukemia, V26, P2317, Doi 10.1038/Leu.2012.100	215	2030
Kyle Ra, 1997, New Engl J Med, V336, P1202, Doi 10.1056/Nejm199704243361702	214	2308
Mikhael Jr, 2012, Blood, V119, P4391, Doi 10.1182/Blood-2011-11-390930	205	2634
